## References

1. Salgo B, Schmitz A, Henze G, Stutz K, Dullenkopf A, Neff S, Gerber AC, Weiss M: Evaluation of a new recommendation for improved cuffed tracheal tube size selection in infants and small children. *Acta Anaesthesiol Scand* 2006; 50:557–61
2. Weiss M, Dullenkopf A, Fischer JE, Keller C, Gerber AC; European Paediatric Endotracheal Intubation Study Group: Prospective randomized controlled multi-centre trial of cuffed or uncuffed endotracheal tubes in small children. *Br J Anaesth* 2009; 103:867–73
3. MacKendrick W, Slotarski K, Casserly G, Hawkins HS, Hageman JR: *Pulmonary Care, Assisted Ventilation of the Neonate*, 5th edition. Edited by Goldsmith JP, Karotkin EH, St. Louis, Elsevier, 2011, pp 107–25
4. Lerman J, Coté CJ, Steward DJ: *Techniques and Procedures, Manual of Pediatric Anesthesia: With an Index of Pediatric Syndromes*, 6th edition. Philadelphia, Elsevier, 2009, Table 4–6, pp 91

## ANESTHESIOLOGY REFLECTIONS FROM THE WOOD LIBRARY-MUSEUM

### Drs. Annis and Betcher Examine Jacksonia

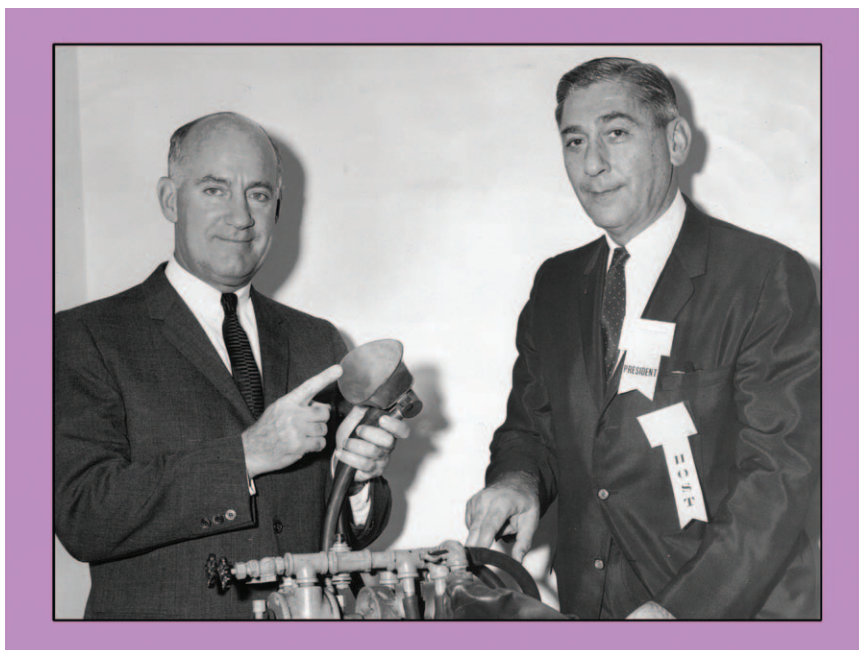

Nearly 50 years ago, in November of 1963, the president of the American Medical Association (left, Edward Annis, M.D.) and the president of the “WLM,” or Wood Library-Museum (right, Albert Betcher, M.D.), celebrated the Park Ridge, Illinois, opening of the WLM. As part of the festivities, the American Society of Anesthesiologists photographed AMA Pres. Annis handling the mask of an early carbon dioxide-absorbing apparatus designed by Dr. Dennis E. Jackson. Sadly, Dr. Betcher could not introduce Dr. Annis to Paul Wood, M.D.—the WLM’s founder had suffered a fatal heart attack in May of 1963 while preparing to open his namesake museum. (Copyright © the American Society of Anesthesiologists, Inc.)

*George S. Bause, M.D., M.P.H., Honorary Curator, ASA’s Wood Library-Museum of Anesthesiology, Park Ridge, Illinois, and Clinical Associate Professor, Case Western Reserve University, Cleveland, Ohio. UJYC@aol.com.*
